# Supplementary material for: Decarbonylation of ethanol to methane, carbon monoxide and hydrogen by a [PNP]Ir complex
Source: Royal Society of Chemistry journal article supplement (doi:10.1039/b914083b), 2009-11-23
Supplement: b914083b.pdf [file b914083b.pdf]

## Supporting Information for

# Decarbonylation of Ethanol to Methane, Carbon Monoxide and Hydrogen by a [PNP]Ir Complex

Jonathan G. Melnick, Alexander T. Radosevich, Dino Villagrán and Daniel G. Nocera\*

*Department of Chemistry, 6-355, Massachusetts Institute of Technology, 77 Massachusetts Avenue, Cambridge, Massachusetts 02139-4307*

| <i>Index</i>                                                                                      | <i>Page</i> |
|---------------------------------------------------------------------------------------------------|-------------|
| Experimental methods                                                                              | S2          |
| Preparation of compounds                                                                          | S2-S4       |
| Photolysis spectra of <i>trans</i> -[PNP <sup>Pr<sup>i</sup></sup> ]Ir(H)(Me)(CO)                 | S4          |
| GC-MS traces of <i>trans</i> -[PNP <sup>Pr<sup>i</sup></sup> ]Ir(N <sub>2</sub> ) photolysis EtOH | S5-S6       |
| GC of <i>trans</i> -[PNP <sup>Pr<sup>i</sup></sup> ]Ir(N <sub>2</sub> ) photolysis in EtOH        | S6          |
| Reaction of [PNP <sup>Pr<sup>i</sup></sup> ]Ir(H) <sub>2</sub> with HC(O)Me                       | S6          |
| X-Ray structural data                                                                             | S8          |
| X-Ray structure of <i>trans</i> -[PNP <sup>Pr<sup>i</sup></sup> ]Ir(H)(Me)(CO)                    | S9          |
| X-Ray structure of <i>trans</i> -[PNP <sup>Pr<sup>i</sup></sup> ]Ir(H)(Et)(CO)                    | S10         |
| X-Ray structure of [PNP <sup>Pr<sup>i</sup></sup> ]Ir(N <sub>2</sub> )·MesNH <sub>2</sub>         | S11         |
| Computational details                                                                             | S12         |
| Calculated structures                                                                             | S13-S17     |
| Coordinates of calculated structures                                                              | S18-S32     |

## Experimental Methods

**General Considerations.** All manipulations were carried out in oven-dried glassware under an inert atmosphere provided either by a N<sub>2</sub>-filled glovebox or by using standard Schlenk techniques. All reaction solvents were reagent grade (Aldrich) or better and were dried and degassed by standard methods.<sup>1</sup> [PNP<sup>Pr<sup>i</sup></sup>Ir(H)<sub>2</sub>]<sup>2</sup> and 2,4,6-Me<sub>3</sub>-C<sub>6</sub>H<sub>2</sub>-N<sub>3</sub> (MesN<sub>3</sub>)<sup>3</sup> were prepared according to the literature methods. Norbornylene (NBE) was purchased from Aldrich and used without further purification. CDCl<sub>3</sub> and C<sub>6</sub>D<sub>6</sub> were purchased from Cambridge Isotope Laboratories and stored over activated 4 Å MS in the glovebox prior to use.

<sup>1</sup>H, <sup>13</sup>C, and <sup>31</sup>P NMR spectra were acquired on a Bruker DRX 400 MHz spectrometer in the specified solvent in sealable J. Young NMR tubes. <sup>1</sup>H and <sup>13</sup>C NMR spectra were calibrated against the residual protio-solvent resonances (benzene δ 7.16); <sup>31</sup>P NMR spectra were referenced externally to H<sub>3</sub>PO<sub>4</sub> (δ 0 ppm). Infrared spectra were acquired on a Perkin-Elmer Model 2000 FT-IR spectrophotometer in a potassium bromide matrix. UV-vis spectra were recorded at room temperature in quartz cuvettes on a Varian Cary 5000 UV-vis-NIR spectrophotometer. Photochemical reactions were performed using a 1000 W high pressure Hg/Xe arc lamp (Oriel). The beam was passed through a water-jacketed filter holder containing appropriate long pass filters, an iris, and collimating lens. High resolution electrospray ionization mass spectrometry was performed in the MIT Department of Chemistry Instrument Facility. Mass spectrometric analysis of evolved methane and hydrogen was performed using an Agilent Technologies 5975C mass selective detector operating in electron impact ionization mode. Gas chromatography quantification of hydrogen and methane was performed on an HP 6890 series GC equipped with a 50 m × 0.530 mm, 25 μm, HP Mole Sieve column and a thermal conductivity detector (TCD). An injection temperature of 150°C, oven temperature of 200°C, and detector temperature of 250°C were used with a flow rate of the carrier gas, N<sub>2</sub>, at 8 psi or 5 mL/min. Elemental analysis was performed by Midwest Microlabs (Indianapolis, IN).

**Synthesis of *trans*-[PNP<sup>Pr<sup>i</sup></sup>Ir(H)(Me)(CO)].** Three synthetic routes afforded *trans*-[PNP<sup>Pr<sup>i</sup></sup>Ir(H)(Me)(CO)]: (a) In a 100 mL Schlenk flask equipped with a magnetic stirbar, a mixture of [PNP<sup>Pr<sup>i</sup></sup>Ir(H)<sub>2</sub>] (100 mg, 0.16 mmol) and NBE (100 mg, 1.06 mmol) was treated with ca. 40 mL EtOH. The mixture slowly dissolves over the course of 1 h, and was stirred at room temperature for 1 d over which time the solution turns yellow. The solvent was removed *in vacuo* to give [PNP<sup>Pr<sup>i</sup></sup>Ir(H)(Me)(CO) as a yellow solid in a yield of 85 mg (80%). Crystals suitable for X-ray diffraction were obtained by cooling a saturated solution of [PNP<sup>Pr<sup>i</sup></sup>Ir(H)(Me)(CO) in Et<sub>2</sub>O to -40 °C. (b) In a 100 mL Schlenk flask equipped with a magnetic stirbar, [PNP<sup>Pr<sup>i</sup></sup>Ir(N<sub>2</sub>) (20 mg, 0.031 mmol) was refluxed in EtOH for 1 d. The solvent

<sup>1</sup> Armarego, W. L. F.; Perrin, D. D. *Purification of Laboratory Chemicals*, 4th ed.; Butterworth-Heinemann: Oxford, 1996.

<sup>2</sup> Fan, L.; Parkin, S.; Ozerov, O. V. *J. Am. Chem. Soc.* **2005**, *127*, 16772-16773.

<sup>3</sup> Ranu, B. C.; Sarkar, A.; Chakraborty, R. *J. Org. Chem.* **1994**, *59*, 4114-4116.

was removed *in vacuo* to give  $[\text{PNP}^{\text{Pr}^i}]\text{Ir}(\text{H})(\text{Me})(\text{CO})$  as a yellow solid. (c) In a 100 mL Schlenk flask equipped with a magnetic stirbar, a mixture of  $[\text{PNP}^{\text{Pr}^i}]\text{Ir}(\text{H})_2$  (20 mg, 0.03 mmol) was treated with ca. 5 mL acetaldehyde. The solution was stirred for 1 d at room temperature over which time the color of solution changed from red to yellow. The solvent was removed *in vacuo* and product formation determined by  $^1\text{H}$  NMR.

$^1\text{H}$  NMR ( $\text{C}_6\text{D}_6$ ): 7.70 (d, 2H,  $^3J_{\text{H-H}} = 8.8$  Hz, Ar-*H*), 6.91 (s, 2H, Ar-*H*), 6.71 (d, 2H,  $^3J_{\text{H-H}} = 8.8$  Hz, Ar-*H*), 2.51 (br m, 2H, *CHMe*<sub>2</sub>), 2.19 (s, 6H, Ar-*CH*<sub>3</sub>), 2.02 (br m, 2H, *CHMe*<sub>2</sub>), 1.32 - 0.92 (m, 24H, *CHMe*<sub>2</sub>), 0.58 (br, 3H, Ir-*CH*<sub>3</sub>), -8.22 (t, 1H,  $^2J_{\text{P-H}} = 16.0$  Hz, Ir-*H*).  $^{13}\text{C}\{^1\text{H}\}$  NMR ( $\text{C}_6\text{D}_6$ ): 160.4 (t, 1C,  $^2J_{\text{P-C}} = 9.6$  Hz, Ir-CO), 131.7(s, 2C, (*ArPPPr*<sup>i</sup>)<sub>2</sub>N), 131.6(s, 2C, (*ArPPPr*<sup>i</sup>)<sub>2</sub>N), 124.8 (s, 2C, (*ArPPPr*<sup>i</sup>)<sub>2</sub>N), 123.7(s, 2C, (*ArPPPr*<sup>i</sup>)<sub>2</sub>N), 123.5(s, 2C, (*ArPPPr*<sup>i</sup>)<sub>2</sub>N), 117.1(t, 2C,  $^1J_{\text{P-C}} = 5.3$  Hz (MeC<sub>5</sub>H<sub>3</sub>CPPr<sup>i</sup>)<sub>2</sub>N), 27.4(t, 2C,  $^1J_{\text{P-C}} = 17.9$  Hz, *CHMe*<sub>2</sub>), 26.6(t, 2C,  $^1J_{\text{P-C}} = 15.3$  Hz, *CHMe*<sub>2</sub>), 20.9(s, 2C, *CHMe*<sub>2</sub>), 20.5(s, 2C, *CHMe*<sub>2</sub>), 19.6 (s, 2C, Ar-*CH*<sub>3</sub>), 18.6(s, 2C, *CHMe*<sub>2</sub>), 18.4(s, 2C, *CHMe*<sub>2</sub>), -26.9(t, 1C,  $^2J_{\text{P-C}} = 5.8$  Hz, Ir-*CH*<sub>3</sub>).  $^{31}\text{P}\{^1\text{H}\}$  NMR ( $\text{C}_6\text{D}_6$ ): 40.7 (s).

IR Data (KBr pellet,  $\text{cm}^{-1}$ ) 2960(m), 2922(m), 2870(m), 2361(s), 2342(m), 2171(w), 1987(vs, CO), 1932(s), 1595(m), 1458(vs), 1388(w), 1363(w), 1316(s), 1290(w), 1257(w), 1240(w), 1210(w), 1146(w), 1095(w), 1062(w), 1029(w), 928(w), 914(w), 883(m), 828(w), 804(s), 728(w), 703(w), 668(m), 617(w), 588(w), 570(w), 554(w), 534(w), 515(w), 501(w), 472(w), 449(w), 419(w).

Analysis Calcd. for  $[\text{PNP}^{\text{Pr}^i}]\text{Ir}(\text{H})(\text{Me})(\text{CO})$ : C, 50.6%; H, 6.7%; N, 2.1%. Found: C, 50.3%; H, 6.5%; N, 2.4%.

Mass spectrum: 665.2  $\{\text{M}\}^+$ , 650.2  $\{\text{M} - \text{CH}_4 + 1\}^+$ .

**Synthesis of *trans*- $[\text{PNP}^{\text{Pr}^i}]\text{Ir}(\text{H})(\text{Et})(\text{CO})$ .** In a 100 mL Schlenk flask equipped with a magnetic stirbar, a mixture of  $[\text{PNP}^{\text{Pr}^i}]\text{Ir}(\text{H})_2$  (160 mg, 0.25 mmol) and NBE (140 mg, 1.49 mmol) was treated with ca. 20 mL *n*-PrOH. The mixture slowly dissolved over the course of 1 h, and was stirred at room temperature for 1 d over which time the solution turned yellow. The solvent was removed *in vacuo* to give  $[\text{PNP}^{\text{Pr}^i}]\text{Ir}(\text{H})(\text{Et})(\text{CO})$  as a yellow solid. Yield 130 mg, 75%. Crystals suitable for X-ray diffraction were obtained by cooling a saturated solution of  $[\text{PNP}^{\text{Pr}^i}]\text{Ir}(\text{H})(\text{Et})(\text{CO})$  in Et<sub>2</sub>O to -40°C.

$^1\text{H}$  NMR ( $\text{C}_6\text{D}_6$ ): 7.69 (d, 2H,  $^3J_{\text{H-H}} = 8.4$  Hz, Ar-*H*), 6.90 (s, 2H, Ar-*H*), 6.72 (d, 2H,  $^3J_{\text{H-H}} = 8.4$  Hz, Ar-*H*), 2.60 (m, 2H, *CHMe*<sub>2</sub>), 2.19 (s, 6H, Ar-*CH*<sub>3</sub>), 1.97 (m, 2H, *CHMe*<sub>2</sub>), 1.95 (t, 2H,  $^3J_{\text{H-H}} = 7.0$  Hz, IrCH<sub>2</sub>CH<sub>3</sub>), 1.57 (m, 2H,  $^3J_{\text{H-H}} = 7.0$  Hz, IrCH<sub>2</sub>CH<sub>3</sub>), 1.32 - 1.14 (m, 18H, *CHMe*<sub>2</sub>), 0.92 (m, 6H, *CHMe*<sub>2</sub>), -8.88 (t, 1H,  $^2J_{\text{P-H}} = 17.0$  Hz, Ir-*H*).  $^{31}\text{P}\{^1\text{H}\}$  NMR ( $\text{C}_6\text{D}_6$ ): 39.6 (s).

IR Data (KBr pellet,  $\text{cm}^{-1}$ ) 2929(m), 2362(m), 2341(m), 2171(w), 1973(vs, CO), 1931(m), 1458(vs), 1378 (w), 1313(s), 1257(w), 1210(w), 1148(w), 1067(w), 1029(w), 929(w), 881(w), 801(m), 729(w), 703(w), 668(w), 655(m), 636(m), 590(w), 572(w), 557(w), 517(m), 473(w), 419(w).

Analysis Calcd. for  $[\text{PNP}^{\text{Pr}^i}]\text{Ir}(\text{H})(\text{Et})(\text{CO})$ : C, 51.3%; H, 6.8%; N, 2.1%. Found: C, 51.3%; H, 6.9%; N, 2.2%.

Mass spectrum: 680.3  $\{\text{M}+1\}^+$ , 650.2  $\{\text{M} - \text{C}_2\text{H}_6 + 1\}^+$

**Synthesis of  $[\text{PNP}^{\text{Pr}^i}]\text{Ir}(\text{CO})$ : From *trans*- $[\text{PNP}^{\text{Pr}^i}]\text{Ir}(\text{H})(\text{Me})(\text{CO})$ .** In a J. Young NMR tube, *trans*- $[\text{PNP}^{\text{Pr}^i}]\text{Ir}(\text{H})(\text{Me})(\text{CO})$  in  $\text{C}_6\text{D}_6$  with 1  $\mu\text{L}$  mesitylene as an internal standard was photolyzed ( $\lambda_{\text{exc}} \geq 338 \text{ nm}$ ) for 16 h. The resulting product was determined by  $^1\text{H}$  NMR to be 98.5% formation of  $[\text{PNP}^{\text{Pr}^i}]\text{Ir}(\text{CO})^4$  accompanied by formation of  $\text{CH}_4$  ( $\delta = 0.16 \text{ ppm}$ ).

**From *trans*- $[\text{PNPPri}]\text{Ir}(\text{H})(\text{Et})(\text{CO})$ .** In a J. Young NMR tube, *trans*- $[\text{PNP}^{\text{Pr}^i}]\text{Ir}(\text{H})(\text{Me})(\text{CO})$  in  $\text{C}_6\text{D}_6$  with 1  $\mu\text{L}$  mesitylene as an internal standard was photolyzed ( $\lambda_{\text{exc}} \geq 338 \text{ nm}$ ) with for 16 h. The resulting product was determined by  $^1\text{H}$  NMR to be 99.3% formation of  $[\text{PNP}^{\text{Pr}^i}]\text{Ir}(\text{CO})$  accompanied by formation of  $\text{C}_2\text{H}_6$  ( $\delta = 0.80 \text{ ppm}$ ).

**Synthesis of  $[\text{PNP}^{\text{Pr}^i}]\text{IrN}_2$ .** A solution of  $[\text{PNP}^{\text{Pr}^i}]\text{Ir}(\text{H})_2$  (721 mg, 1.15 mmol) in  $\sim 25 \text{ mL}$  cyclohexane was treated with  $\text{MesN}_3$  (185 mg, 1.15 mmol) and stirred at room temperature for 16 h over which time the solution turned from red to dark green. The solvent was removed *in vacuo* initially at room temperature followed by heating at  $115 \text{ }^\circ\text{C}$ . The dark green powder was isolated to yield 475 mg (63% yield). Crystals of the composition  $[\text{PNP}^{\text{Pr}^i}]\text{Ir}(\text{N}_2) \cdot \text{MesNH}_2$  were obtained from slow evaporation of a  $\text{C}_6\text{H}_6$  solution of  $[\text{PNP}^{\text{Pr}^i}]\text{Ir}(\text{N}_2)$  and  $\text{MesNH}_2$  prior to heating the reaction mixture *in vacuo*. Characterization of  $[\text{PNP}^{\text{Pr}^i}]\text{Ir}(\text{N}_2)$  has been previously reported.<sup>5</sup>

**Conversion of *trans*- $[\text{PNP}^{\text{Pr}^i}]\text{Ir}(\text{H})(\text{Me})(\text{CO})$  to  $[\text{PNP}^{\text{Pr}^i}]\text{Ir}(\text{CO})$  under  $\text{N}_2$ .** A stock solution of *trans*- $[\text{PNP}^{\text{Pr}^i}]\text{Ir}(\text{H})(\text{Me})(\text{CO})$  (2 mg, 0.003 mmol) in 20 mL of  $\text{C}_6\text{H}_6$  (0.15 mM solution) was prepared. 4 mL of the stock solution was added to a high-vacuum Starna cell and photolyzed ( $\lambda_{\text{exc}} \geq 338 \text{ nm}$ ) over 6 min and spectra were recorded in 30 s intervals.

**Figure S1.** UV-vis trace of photolysis ( $\lambda_{\text{exc}} \geq 338 \text{ nm}$ ) of *trans*- $[\text{PNP}^{\text{Pr}^i}]\text{Ir}(\text{H})(\text{Me})(\text{CO})$  in 30 s increments under 1 atm  $\text{N}_2$ .

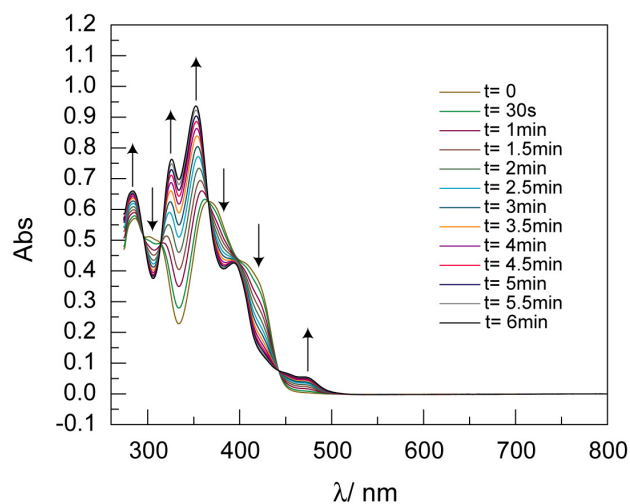

<sup>4</sup> Whited, M. T.; Grubbs, R. H. *J. Am. Chem. Soc.* **2008**, *130*, 5874-5875.

<sup>5</sup> Whited, M. T.; Grubbs, R. H. *J. Am. Chem. Soc.* **2008**, *130*, 16476-16477.

**Photolysis of  $[\text{PNP}^{\text{Pr}^{\text{i}}}] \text{IrN}_2$  for GC-MS Experiments.** Photolysis experiments for GC-MS were carried out in a 2-stopcock reactor custom made by James Glass of Hanover, Massachusetts (Figure S5).  $[\text{PNP}^{\text{Pr}^{\text{i}}}] \text{Ir}(\text{N}_2)$  (50 mg, 0.076 mmol) was treated with 5 mL of EtOH (or EtOD) and degassed by three freeze-pump-thaw cycles. The solution was photolyzed for 1 d. The sample was frozen with  $\text{N}_2(\ell)$  and was rapidly warmed by immersion in water. The evolved gases were fed into the mass spectrometer for real-time analysis with helium used as a carrier gas.

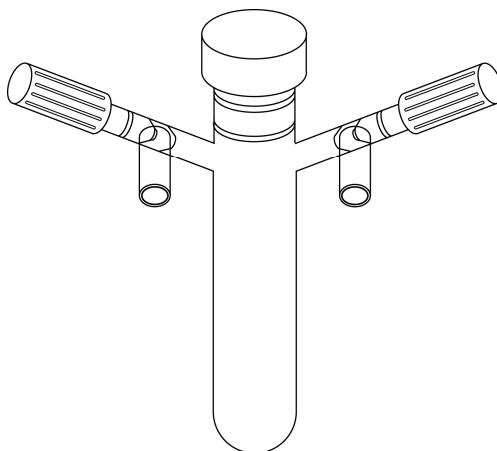

**Figure S2.** Custom made 2-stopcock reactor used for the GC-MS Experiments of the photolysis of  $[\text{PNP}^{\text{Pr}^{\text{i}}}] \text{Ir}(\text{N}_2)$  in EtOH or EtOD.

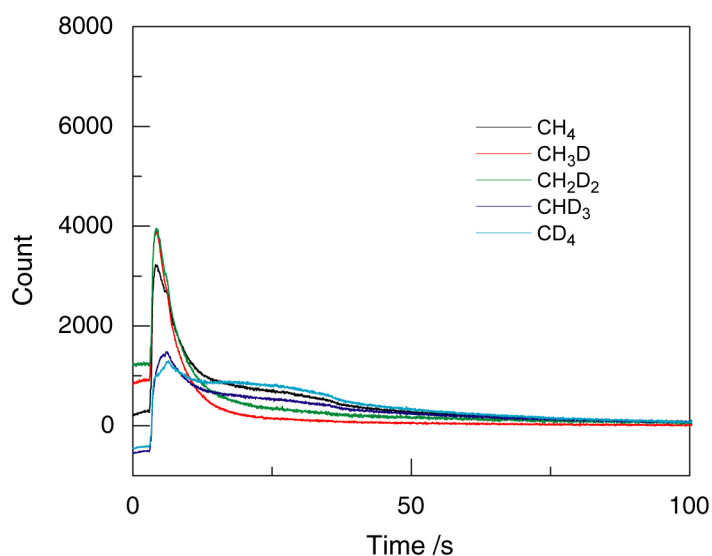

**Figure S3.** GC-MS of the head space of photolysis of  $[\text{PNP}^{\text{Pr}^{\text{i}}}] \text{Ir}(\text{N}_2)$  in EtOD.

**Table S2.** Percent composition of  $\text{CH}_x\text{D}_{4-x}$  from the GC-MS of the head space of photolysis of  $[\text{PNP}^{\text{Pr}^i}]\text{Ir}(\text{N}_2)$  in EtOH

|        | $\text{CH}_4$ | $\text{CH}_3\text{D}$ | $\text{CH}_2\text{D}_2$ | $\text{CHD}_3$ | $\text{CD}_4$ | Total count |
|--------|---------------|-----------------------|-------------------------|----------------|---------------|-------------|
| 5 sec  | 23.9%         | 27.3%                 | 28.9%                   | 11.1%          | 8.8%          | 12401       |
| 10 sec | 24.9%         | 18.1%                 | 22.9%                   | 16.2%          | 17.9%         | 5404        |
| 15 sec | 25.7%         | 11.6%                 | 18.9%                   | 19.1%          | 24.8%         | 3431        |
| 20 sec | 26.7%         | 7.7%                  | 15.7%                   | 20.3%          | 29.6%         | 2861        |
| 25 sec | 27.5%         | 5.9%                  | 12.4%                   | 21.2%          | 33.0%         | 2487        |
| 30 sec | 26.8%         | 5.6%                  | 13.3%                   | 21.3%          | 32.9%         | 2272        |
| 35 sec | 26.6%         | 5.2%                  | 13.2%                   | 21.3%          | 33.7%         | 1888        |
| 40 sec | 25.8%         | 6.3%                  | 15.0%                   | 22.1%          | 30.8%         | 1451        |
| 45 sec | 26.7%         | 4.9%                  | 13.3%                   | 23.8%          | 31.4%         | 1212        |
| 50 sec | 26.0%         | 5.4%                  | 14.7%                   | 22.0%          | 31.9%         | 1025        |

**Photolysis of  $[\text{PNP}^{\text{Pr}^i}]\text{Ir}(\text{N}_2)$  in EtOH for GC.** In a chemglass ampoule,  $[\text{PNP}^{\text{Pr}^i}]\text{Ir}(\text{N}_2)$  (17 mg, 0.026 mmol) in 5 mL EtOH was photolyzed for 1 d. A sample volume of 20  $\mu\text{L}$  of the headspace was injected into the GC. Under the conditions of the experiments,  $\text{H}_2$  has a retention time of 1.11 min. and  $\text{CH}_4$  has retention time of 1.27 min (Figure S7). Quantification was performed by integrating the peak corresponding to each evolved gas and fitting it to a standard calibration curve for  $\text{H}_2$  or  $\text{CH}_4$ , which gave a 79% yield of  $\text{H}_2$  and a 94% yield of  $\text{CH}_4$ .

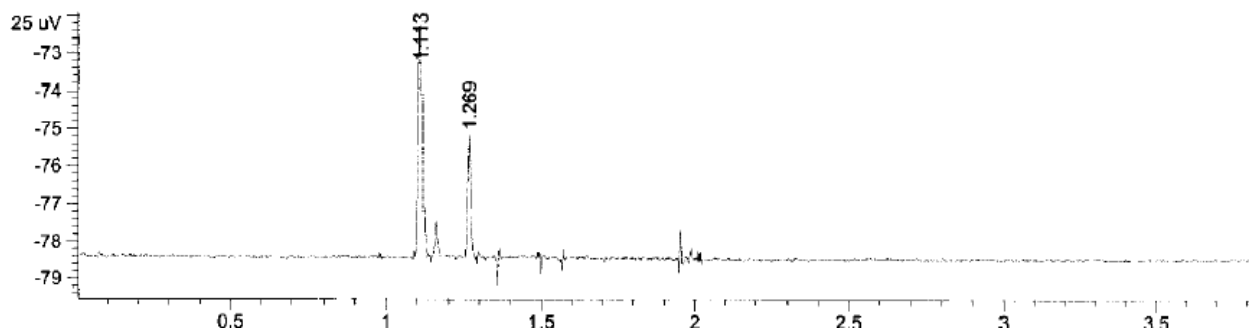

**Figure S4.** GC of the headspace of the photolysis of  $[\text{PNP}^{\text{Pr}^i}]\text{Ir}(\text{N}_2)$  in EtOH for the quantification of evolved  $\text{H}_2$  and  $\text{CH}_4$ .

**Treatment of  $[\text{PNP}^{\text{Pr}^i}]\text{Ir}(\text{H})_2$  with  $\text{HC}(\text{O})\text{Me}$  for quantification of  $\text{H}_2$  by GC.** In a chemglass ampoule,  $[\text{PNP}^{\text{Pr}^i}]\text{Ir}(\text{H})_2$  (40 mg, 0.064 mmol) was treated with 5 mL acetaldehyde. An immediate color change from red to yellow/ orange and vigorous gas evolution is observed. The solution was stirred at room temperature for 30 min. and the headspace was sampled by GC. Under the conditions of the experiments,  $\text{H}_2$  has a retention time of 1.11 min (Figure S8). Quantification was performed by integrating the peak corresponding to each evolved gas and fitting it to a standard calibration curve for  $\text{H}_2$  which gave a 71% yield of  $\text{H}_2$ .

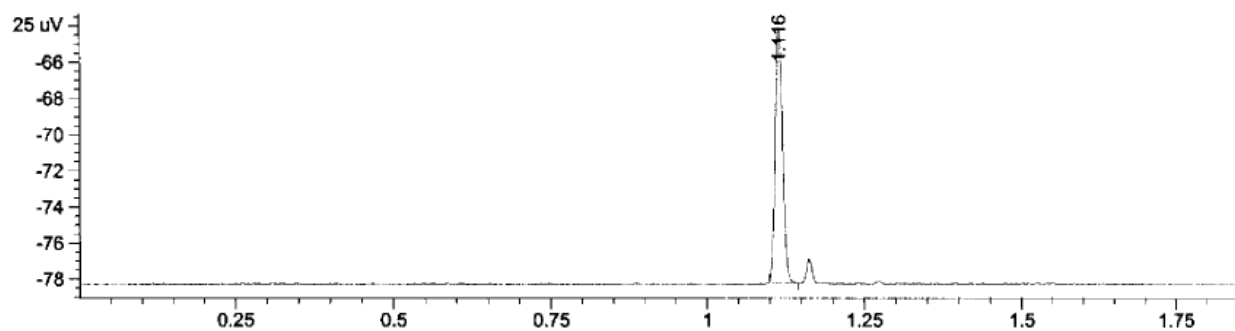

**Figure S5.** GC of the headspace of the treatment of  $[\text{PNP}^{\text{Pr}^i}]\text{Ir}(\text{H})_2$  with acetaldehyde for the quantification of evolved  $\text{H}_2$ .

**X-ray Crystallographic Details.** Single crystals were immersed in a drop of Paratone N oil on a clean microscope slide, affixed to either a mitegen mount and cooled to  $-173\text{ }^\circ\text{C}$ . The crystals were then mounted on a Siemens three-circle goniometer platform equipped with an APEX detector. A graphite monochromator was employed for wavelength selection of the Mo KR radiation ( $\lambda$ )  $0.71073\text{ \AA}$ ). The data were processed and refined using the program SAINT supplied by Siemens Industrial Automation Inc. Structures were solved direct methods and refined by standard difference Fourier techniques in the SHELXTL program suite (6.10 v., Sheldrick G. M., and Siemens Industrial Automation Inc., 2000). Hydrogen atoms were placed in calculated positions using the standard riding model and refined isotropically; all other atoms were refined anisotropically.

**Table S1.** Crystal Intensity Collection and Refinement Data

|                                          | <i>trans</i> -<br>[PNP <sup>Pr<sup>i</sup></sup> ] <sup>Pr<sup>i</sup></sup> Ir(H)(Me)(CO) | <i>trans</i> -<br>[PNP <sup>Pr<sup>i</sup></sup> ] <sup>Pr<sup>i</sup></sup> Ir(H)(Et)(CO) | [PNP <sup>Pr<sup>i</sup></sup> ] <sup>Pr<sup>i</sup></sup> Ir(N <sub>2</sub> )-MesNH <sub>2</sub> |
|------------------------------------------|--------------------------------------------------------------------------------------------|--------------------------------------------------------------------------------------------|---------------------------------------------------------------------------------------------------|
| lattice                                  | Triclinic                                                                                  | Monoclinic                                                                                 | Triclinic                                                                                         |
| formula                                  | C <sub>28</sub> H <sub>44</sub> IrNOP <sub>2</sub>                                         | C <sub>29</sub> H <sub>46</sub> IrNOP <sub>2</sub>                                         | C <sub>35</sub> H <sub>53</sub> IrN <sub>4</sub> P <sub>2</sub>                                   |
| formula weight                           | 664.78                                                                                     | 678.81                                                                                     | 783.95                                                                                            |
| space group                              | P-1                                                                                        | P2(1)/n                                                                                    | P-1                                                                                               |
| <i>a</i> /Å                              | 8.3135(8)                                                                                  | 14.7286(13)                                                                                | 9.8992(12)                                                                                        |
| <i>b</i> /Å                              | 9.8060(10)                                                                                 | 12.3197(11)                                                                                | 11.2251(14)                                                                                       |
| <i>c</i> /Å                              | 17.8528(17)                                                                                | 16.0250(14)                                                                                | 16.388(2)                                                                                         |
| $\alpha$ /°                              | 84.829(2)                                                                                  | 90.00                                                                                      | 101.780(2)                                                                                        |
| $\beta$ /°                               | 83.244(2)                                                                                  | 90.754(2)                                                                                  | 93.376(2)                                                                                         |
| $\gamma$ /°                              | 75.962(2)                                                                                  | 90.00                                                                                      | 93.801(2)                                                                                         |
| <i>V</i> /Å <sup>3</sup>                 | 1399.3(2)                                                                                  | 2907.5(4)                                                                                  | 1773.9(4)                                                                                         |
| <i>Z</i>                                 | 2                                                                                          | 4                                                                                          | 2                                                                                                 |
| temperature (K)                          | 100                                                                                        | 100                                                                                        | 100                                                                                               |
| radiation ( $\lambda$ , Å)               | 0.71073                                                                                    | 0.71073                                                                                    | 0.71073                                                                                           |
| $\rho$ (calcd), g cm <sup>-3</sup>       | 1.578                                                                                      | 1.551                                                                                      | 1.468                                                                                             |
| $\mu$ (Mo K $\alpha$ ), mm <sup>-1</sup> | 4.906                                                                                      | 4.724                                                                                      | 3.882                                                                                             |
| $\theta$ max, deg.                       | 30.56                                                                                      | 31.65                                                                                      | 30.50                                                                                             |
| no. of data                              | 8284                                                                                       | 9217                                                                                       | 10498                                                                                             |
| no. of parameters                        | 304                                                                                        | 313                                                                                        | 384                                                                                               |
| <i>R</i> <sub>1</sub> (observed)         | 0.0471                                                                                     | 0.0226                                                                                     | 0.0535                                                                                            |
| <i>wR</i> <sub>2</sub> (observed)        | 0.0732                                                                                     | 0.0529                                                                                     | 0.0944                                                                                            |
| GOF                                      | 1.024                                                                                      | 1.002                                                                                      | 1.005                                                                                             |



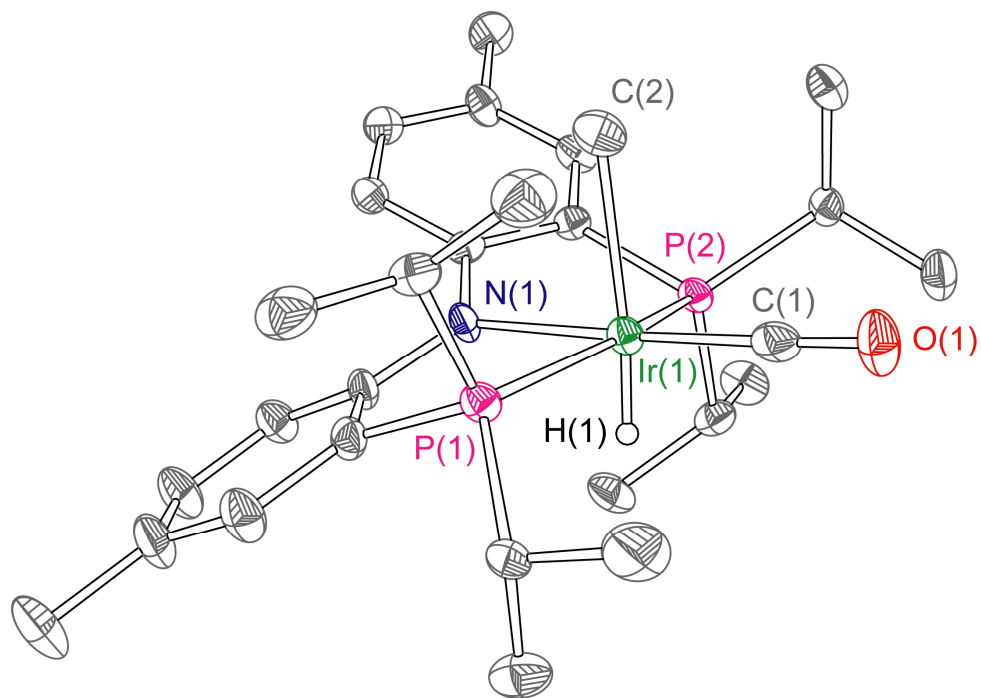

**Figure S6.** The molecular structure of *trans*-[PNP<sup>Pr<sup>i</sup></sup>]Ir(H)(Me)(CO). Data collected at 100 K, thermal ellipsoids are drawn at the 50% probability level.

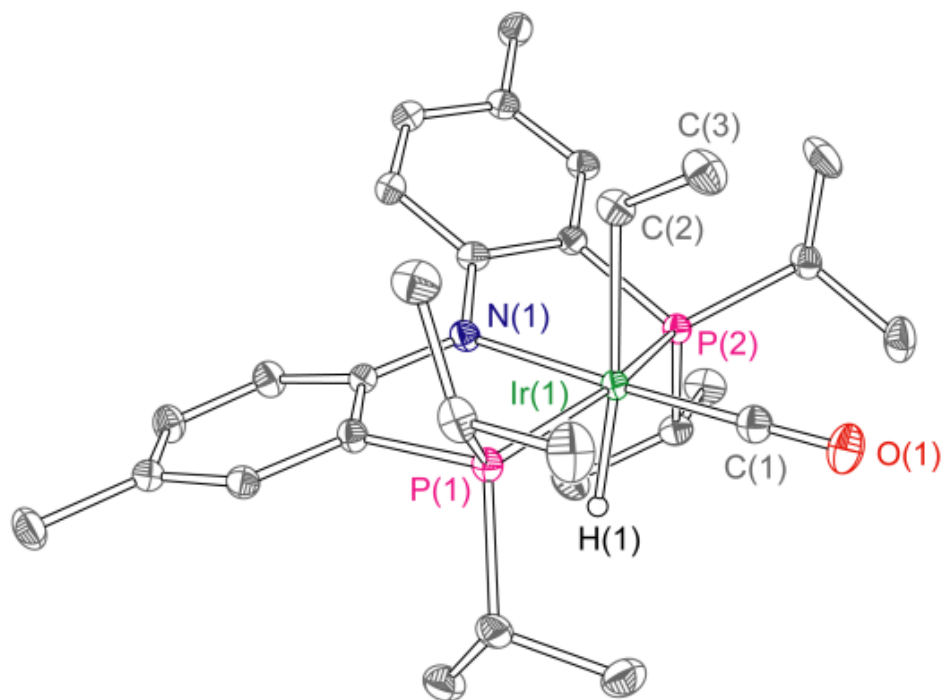

**Figure S7.** The molecular structure of *trans*-[PNP<sup>Pr<sup>i</sup></sup>]Ir(H)(Et)(CO). Data collected at 100 K, thermal ellipsoids are drawn at the 50% probability level

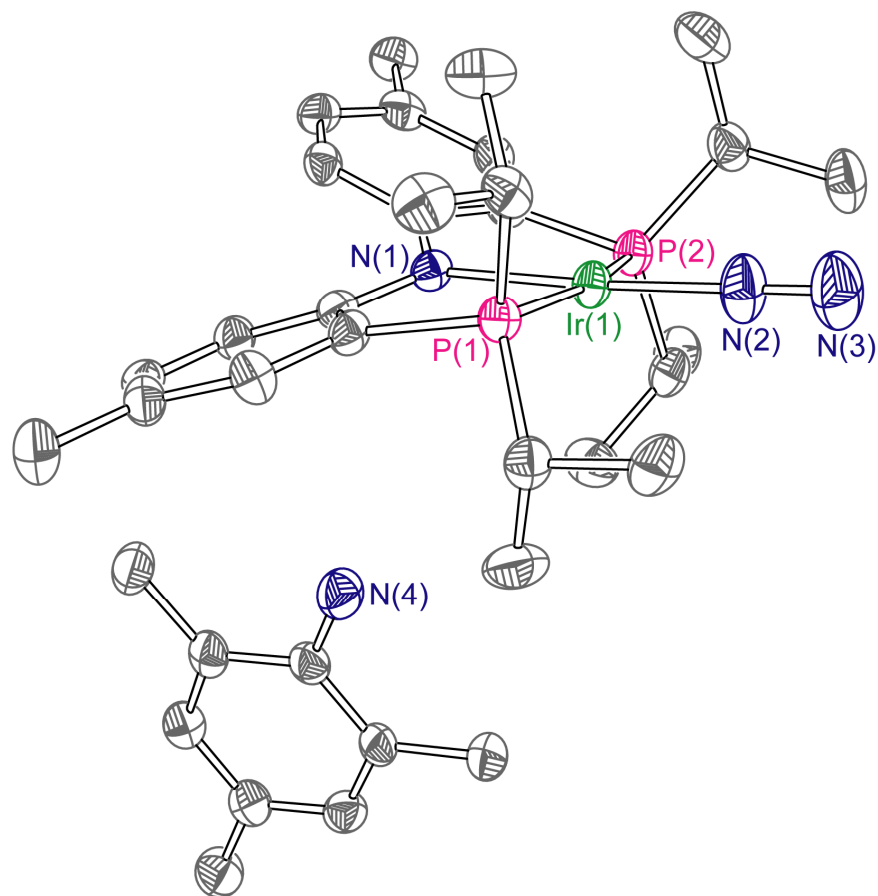

**Figure S8.** The molecular structure of [PNP<sup>Pr<sup>i</sup></sup>]Ir(N<sub>2</sub>)·MesNH<sub>2</sub>. Data collected at 100 K, thermal ellipsoids are drawn at the 50% probability level.

**Computational Details.** All calculations were carried out using DFT as implemented in the Gaussian03<sup>6</sup> suite of programs. Geometry optimizations were performed with the B3LYP density functional<sup>7-10</sup> and the 6-31G\* (C, H, N, P, O). An effective core potential (ECP) representing the 1s2s2p3s3p3d4s4p4d core was used for the iridium atoms with a double- $\zeta$  basis set (LANL2DZ). All calculations were spin-restricted, and geometry optimizations proceeded without imposed symmetry. Minima were determined by the absence of imaginary frequencies in frequency calculations. Transition states were determined by one and only one imaginary frequency, which showed a mode of vibration along the bond that is cleaved. Comparison of bond lengths in the calculated structures to analogous metrics in single-crystal X-ray diffraction data show close agreement. X-ray *trans*-[PNP<sup>Pr1</sup>]Ir(H)(Me)(CO) Ir–P = 2.32 Å, 2.32 Å; Ir–N = 2.10 Å. Calculated [PNP<sup>Pr1</sup>]Ir(H)(OEt). Ir–P = 2.35 Å, 2.36 Å; Ir–N = 2.12 Å. Calculated [PNP<sup>Pr1</sup>]Ir(H)(CH(OH)Me) Ir–P = 2.36 Å, 2.33 Å; Ir–N = 2.11 Å.

---

<sup>6</sup> Gaussian 03, Revision C.02, Frisch, M. J.; Trucks, G. W.; Schlegel, H. B.; Scuseria, G. E.; Robb, M. A.; Cheeseman, J. R.; Montgomery, Jr., J. A.; Vreven, T.; Kudin, K. N.; Burant, J. C.; Millam, J. M.; Iyengar, S. S.; Tomasi, J.; Barone, V.; Mennucci, B.; Cossi, M.; Scalmani, G.; Rega, N.; Petersson, G. A.; Nakatsuji, H.; Hada, M.; Ehara, M.; Toyota, K.; Fukuda, R.; Hasegawa, J.; Ishida, M.; Nakajima, T.; Honda, Y.; Kitao, O.; Nakai, H.; Klene, M.; Li, X.; Knox, J. E.; Hratchian, H. P.; Cross, J. B.; Bakken, V.; Adamo, C.; Jaramillo, J.; Gomperts, R.; Stratmann, R. E.; Yazyev, O.; Austin, A. J.; Cammi, R.; Pomelli, C.; Ochterski, J. W.; Ayala, P. Y.; Morokuma, K.; Voth, G. A.; Salvador, P.; Dannenberg, J. J.; Zakrzewski, V. G.; Dapprich, S.; Daniels, A. D.; Strain, M. C.; Farkas, O.; Malick, D. K.; Rabuck, A. D.; Raghavachari, K.; Foresman, J. B.; Ortiz, J. V.; Cui, Q.; Baboul, A. G.; Clifford, S.; Cioslowski, J.; Stefanov, B. B.; Liu, G.; Liashenko, A.; Piskorz, P.; Komaromi, I.; Martin, R. L.; Fox, D. J.; Keith, T.; Al-Laham, M. A.; Peng, C. Y.; Nanayakkara, A.; Challacombe, M.; Gill, P. M. W.; Johnson, B.; Chen, W.; Wong, M. W.; Gonzalez, C.; and Pople, J. A.; Gaussian, Inc., Wallingford CT, 2004.

<sup>7</sup> (a) Becke, A. D. *J. Chem. Phys.* **1993**, *98*, 5648-5652. (b) Becke, A. D. *Phys. Rev. A* **1988**, *38*, 3098-3100.

<sup>8</sup> Lee, C. T.; Yang, W. T.; Parr, R. G. *Phys. Rev. B* **1988**, *37*, 785-789.

<sup>9</sup> Vosko, S. H.; Wilk, L.; Nusair, M. *Can. J. Phys.* **1980**, *58*, 1200-1211.

<sup>10</sup> Slater, J. C. *Quantum Theory of Molecules and Solids, Vol. 4: The Self-Consistent Field for Molecules and Solids*; McGraw-Hill: New York, 1974.

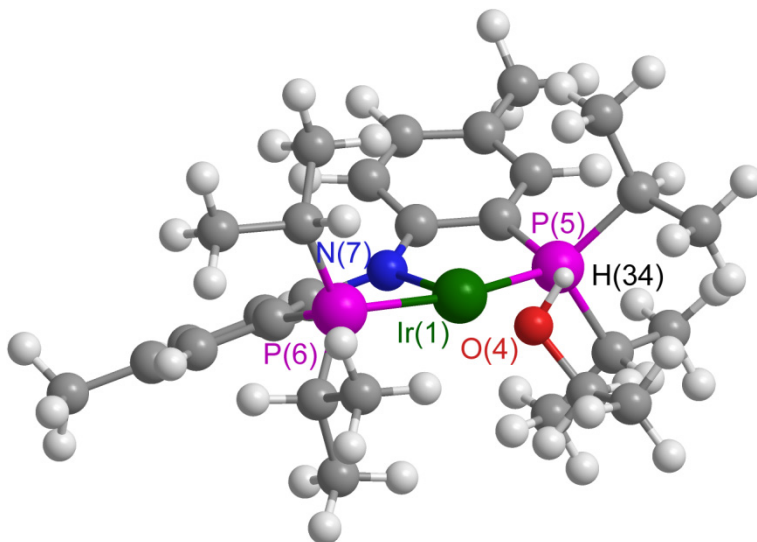

**Figure S9.** Geometry optimized structure of the starting materials of ethanol decarbonylation,  $[\text{PNP}^{\text{Pr}^i}]\text{Ir}$  and EtOH.

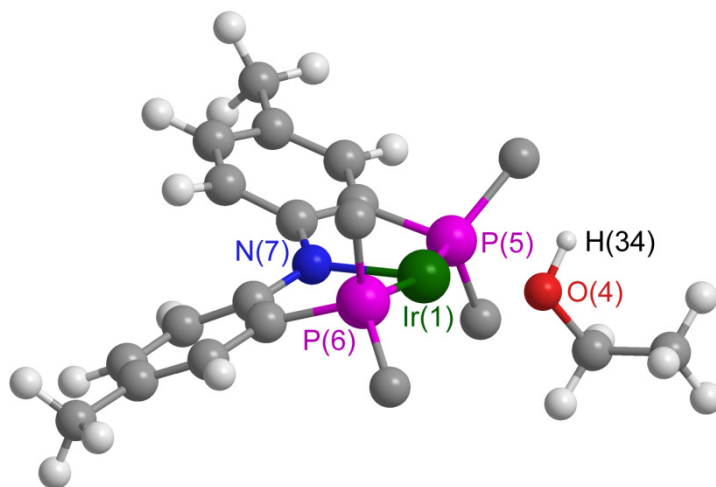

**Figure S10.** Geometry optimized structure of the starting materials of ethanol decarbonylation,  $[\text{PNP}^{\text{Pr}^i}]\text{Ir}$  and EtOH. (methyl groups of ligand isopropyl groups omitted for clarity).

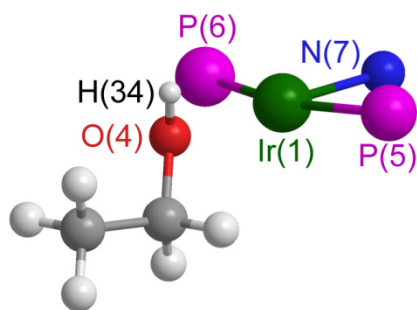

**Figure S11.** Coordination sphere of the geometry optimized structure of the starting materials of ethanol decarbonylation,  $[\text{PNP}^{\text{Pr}^i}]\text{Ir}$  and EtOH.

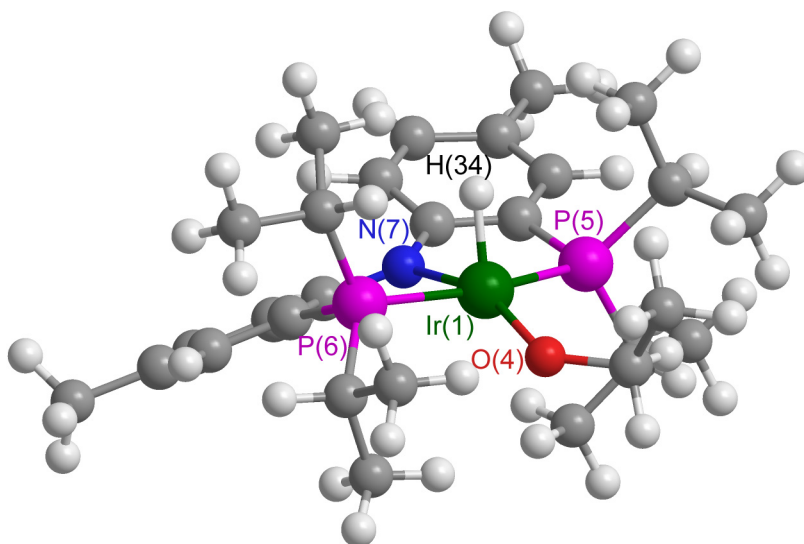

**Figure S12.** Geometry optimized structure of  $[\text{PNP}^{\text{Pr}^i}]\text{Ir}(\text{H})(\text{OEt})$ .

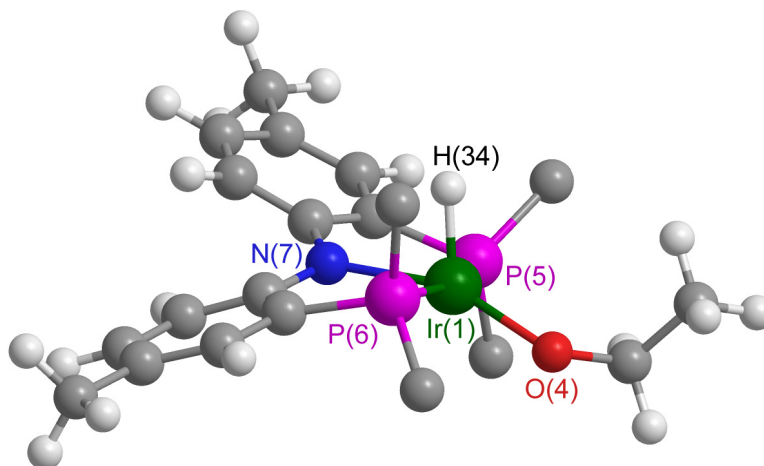

**Figure S13.** Geometry optimized structure of  $[\text{PNP}^{\text{Pr}^i}]\text{Ir}(\text{H})(\text{OEt})$  (methyl groups of ligand isopropyl groups omitted for clarity).

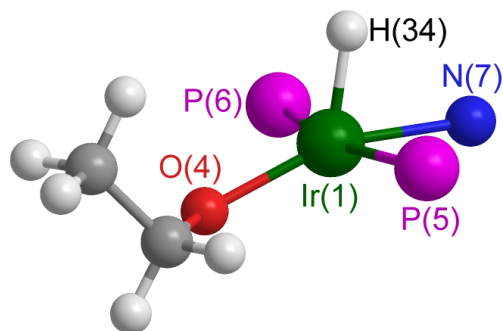

**Figure S14.** Coordination sphere of the geometry optimized structure of  $[\text{PNP}^{\text{Pr}^i}]\text{Ir}(\text{H})(\text{OEt})$ .

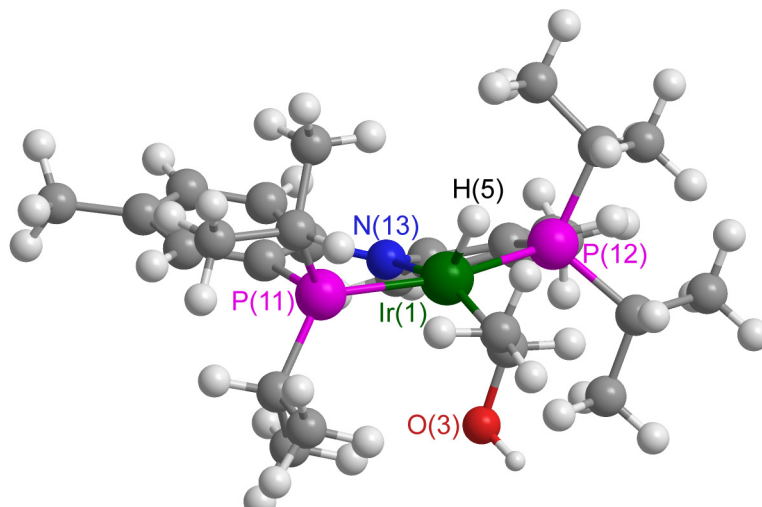

**Figure S15.** Geometry optimized structure of  $[\text{PNP}^{\text{Pri}}]\text{Ir}(\text{H})(\text{CH}(\text{OH})\text{Me})$ .

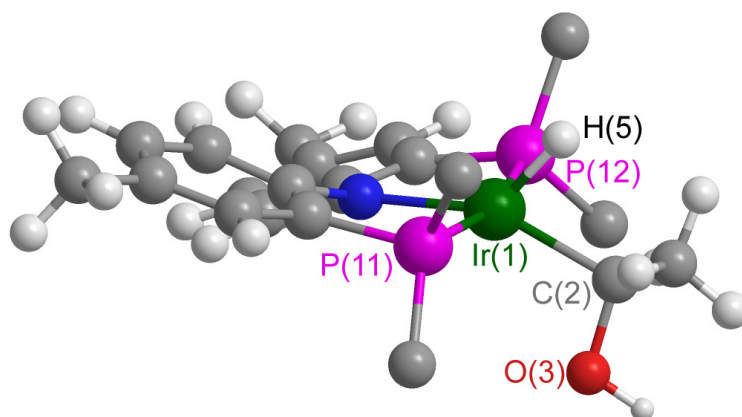

**Figure S16.** Geometry optimized structure of  $[\text{PNP}^{\text{Pri}}]\text{Ir}(\text{H})(\text{CH}(\text{OH})\text{Me})$  (methyl groups of ligand isopropyl groups omitted for clarity).

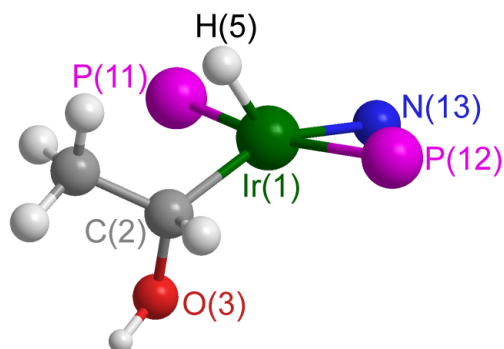

**Figure S17.** Coordination sphere of the geometry optimized structure of  $[\text{PNP}^{\text{Pri}}]\text{Ir}(\text{H})(\text{CH}(\text{OH})\text{Me})$ .

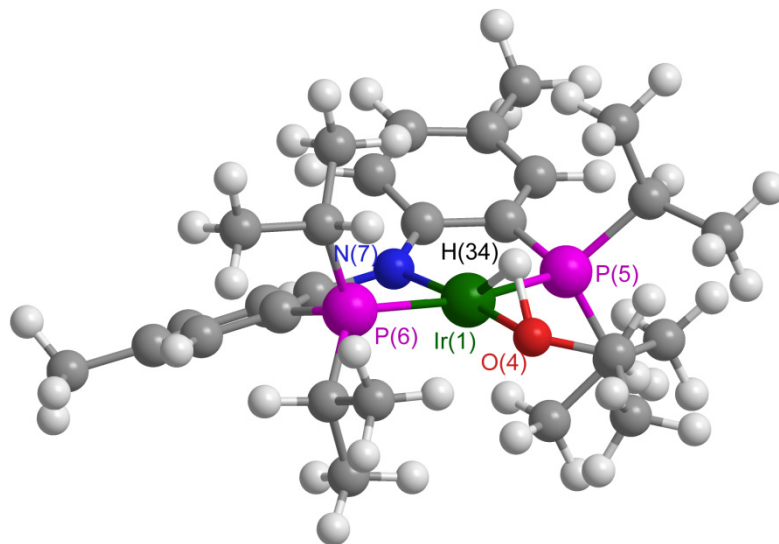

**Figure S18.** Calculated transition state of OH oxidative addition of EtOH to  $[\text{PNP}^{\text{Pr}^i}]\text{Ir}$ .

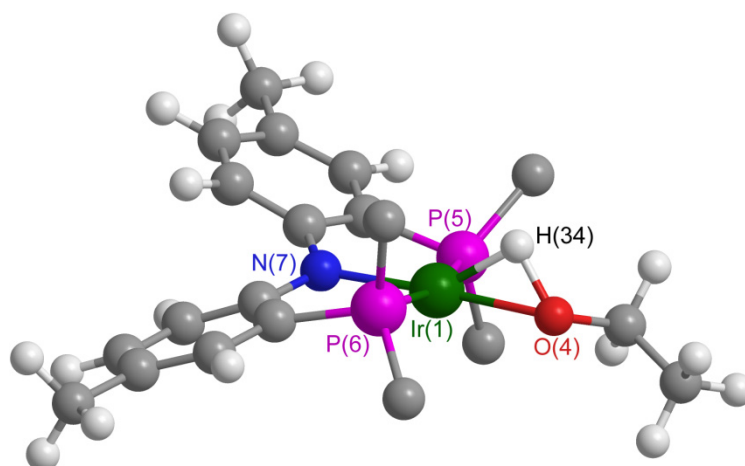

**Figure S19.** Calculated transition state of OH oxidative addition of EtOH to  $[\text{PNP}^{\text{Pr}^i}]\text{Ir}$ . (methyl groups of ligand isopropyl groups omitted for clarity).

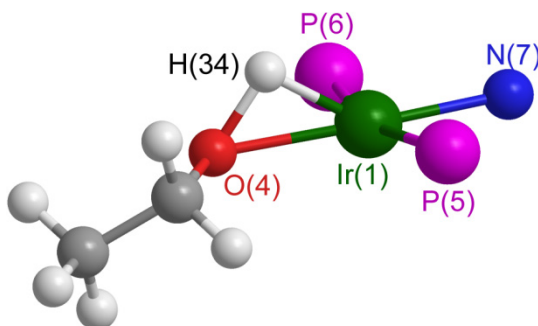

**Figure S20.** Coordination sphere of the calculated transition state of OH oxidative addition of EtOH to  $[\text{PNP}^{\text{Pr}^i}]\text{Ir}$ .



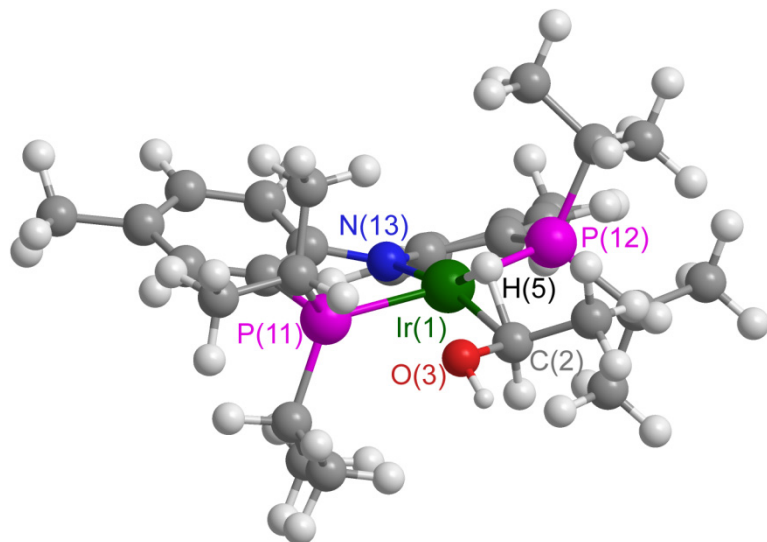

**Figure S21.** Calculated transition state of methylene CH oxidative addition of EtOH to  $[\text{PNP}^{\text{Pr}^i}]\text{Ir}$ .

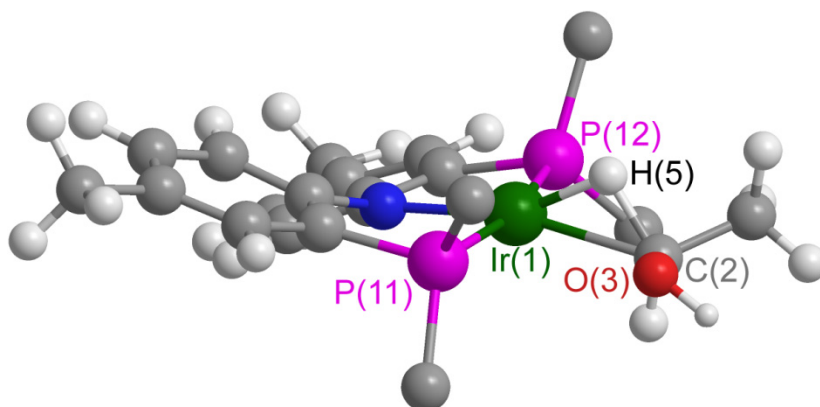

**Figure S22.** Calculated transition state of methylene CH oxidative addition of EtOH to  $[\text{PNP}^{\text{Pr}^i}]\text{Ir}$ . (methyl groups of ligand isopropyl groups omitted for clarity).

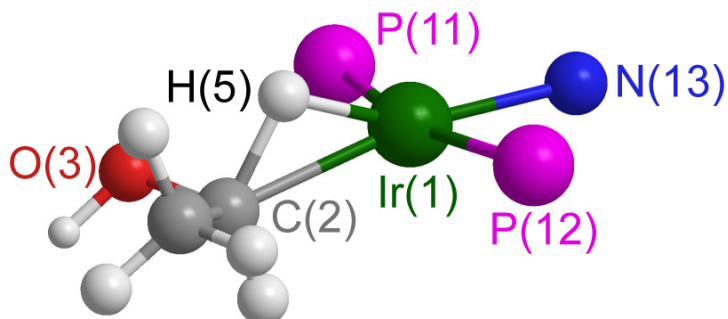

**Figure S23.** Coordination sphere of the calculated transition state of methylene CH oxidative addition of EtOH to  $[\text{PNP}^{\text{Pr}^i}]\text{Ir}$ .

**Table S3.** Cartesian Coordinates for the Geometry Optimized structure of EtOH and [PNP<sup>Pr</sup>]<sup>i</sup>Ir (E = -2012.1324467 Hartrees, E<sub>rel</sub> = 0 kcal/mol).

| Atom | x         | y         | z         |
|------|-----------|-----------|-----------|
| Ir1  | -0.00481  | -0.789223 | 0.073124  |
| C2   | 0.364525  | -3.80847  | -0.926826 |
| C3   | 0.22177   | -5.294596 | -0.634932 |
| O4   | -0.054895 | -3.013539 | 0.208054  |
| P5   | 2.264605  | -0.46751  | -0.233982 |
| P6   | -2.266633 | -0.49528  | 0.455054  |
| N7   | -0.040486 | 1.264528  | -0.063695 |
| C8   | 2.381722  | 1.325274  | 0.067903  |
| C9   | 1.125458  | 1.986698  | 0.165209  |
| C10  | 1.158441  | 3.34368   | 0.580619  |
| C11  | 2.356963  | 4.004996  | 0.803517  |
| C12  | 3.602174  | 3.37302   | 0.644406  |
| C13  | 3.577378  | 2.022679  | 0.293413  |
| C14  | 4.897562  | 4.117709  | 0.865974  |
| C15  | -2.468082 | 1.209798  | -0.158349 |
| C16  | -1.241342 | 1.89062   | -0.395527 |
| C17  | -1.332899 | 3.1467    | -1.047584 |
| C18  | -2.560415 | 3.710044  | -1.366862 |
| C19  | -3.776215 | 3.069722  | -1.075415 |
| C20  | -3.693189 | 1.808248  | -0.482824 |
| C21  | -5.103649 | 3.70765   | -1.411412 |
| C22  | 3.531977  | -1.212522 | 0.950021  |
| C23  | 3.146169  | -0.910101 | 2.406506  |
| C24  | 2.991144  | -0.789764 | -1.951109 |
| C25  | 2.080722  | -0.13596  | -3.003786 |
| C26  | 4.456611  | -0.378675 | -2.155334 |
| C27  | -3.570361 | -1.505945 | -0.45116  |
| C28  | -3.645082 | -2.938359 | 0.103146  |
| C29  | -3.289041 | -1.503947 | -1.96153  |
| C30  | -2.84344  | -0.508256 | 2.254751  |
| C31  | -4.308397 | -0.101891 | 2.472736  |
| C32  | -1.897756 | 0.359057  | 3.101045  |
| C33  | 3.705364  | -2.722875 | 0.730482  |
| H34  | 0.511563  | -3.213578 | 0.971413  |
| H35  | 1.393021  | -3.544678 | -1.197282 |

|     |           |           |           |
|-----|-----------|-----------|-----------|
| H36 | -0.289668 | -3.487547 | -1.738144 |
| H37 | -0.811291 | -5.545707 | -0.373934 |
| H38 | 0.87227   | -5.605623 | 0.19233   |
| H39 | 0.507592  | -5.878227 | -1.517475 |
| H40 | 0.228466  | 3.868576  | 0.76349   |
| H41 | 2.325602  | 5.042474  | 1.13299   |
| H42 | 4.523514  | 1.491079  | 0.216851  |
| H43 | 5.750559  | 3.43111   | 0.904878  |
| H44 | 4.884976  | 4.684472  | 1.805815  |
| H45 | 5.097415  | 4.839954  | 0.062073  |
| H46 | -0.426807 | 3.664958  | -1.338672 |
| H47 | -2.574437 | 4.670569  | -1.879808 |
| H48 | -4.615826 | 1.264103  | -0.291209 |
| H49 | -5.135467 | 4.057379  | -2.451435 |
| H50 | -5.310852 | 4.579982  | -0.776197 |
| H51 | -5.930265 | 3.001718  | -1.274525 |
| H52 | 4.495021  | -0.728435 | 0.741668  |
| H53 | 3.885737  | -1.343714 | 3.092473  |
| H54 | 2.16215   | -1.330258 | 2.645747  |
| H55 | 3.096954  | 0.166164  | 2.593818  |
| H56 | 2.917812  | -1.880203 | -2.073991 |
| H57 | 2.406091  | -0.414526 | -4.014509 |
| H58 | 2.118688  | 0.956785  | -2.927346 |
| H59 | 1.038339  | -0.441402 | -2.866431 |
| H60 | 4.777839  | -0.634761 | -3.173486 |
| H61 | 5.139442  | -0.882099 | -1.461834 |
| H62 | 4.582517  | 0.70241   | -2.034253 |
| H63 | -4.541083 | -1.021175 | -0.283512 |
| H64 | -4.370538 | -3.527482 | -0.472451 |
| H65 | -3.961589 | -2.961254 | 1.151509  |
| H66 | -2.672577 | -3.438124 | 0.036744  |
| H67 | -4.055556 | -2.085904 | -2.489905 |
| H68 | -2.309739 | -1.94586  | -2.177802 |
| H69 | -3.289573 | -0.488729 | -2.369462 |
| H70 | -2.717372 | -1.553742 | 2.56972   |
| H71 | -4.556212 | -0.154517 | 3.540905  |
| H72 | -5.011862 | -0.752006 | 1.941073  |
| H73 | -4.482406 | 0.928866  | 2.145158  |
| H74 | -2.154834 | 0.270943  | 4.164724  |
| H75 | -1.980639 | 1.41601   | 2.822348  |

|     |           |           |           |
|-----|-----------|-----------|-----------|
| H76 | -0.855176 | 0.057761  | 2.959179  |
| H77 | 4.46017   | -3.123832 | 1.418406  |
| H78 | 4.022563  | -2.968741 | -0.288652 |
| H79 | 2.77012   | -3.261761 | 0.931329  |

---

**Table S4.** Cartesian Coordinates for Geometry Optimized Structures  
[PNP<sup>Pr</sup>]<sup>+</sup>Ir(H)(CH(OH)Me) (E = -2012.1275112 Hartrees, E<sub>rel</sub> = +3.1 kcal/mol).

| Atom | x         | y         | z         |
|------|-----------|-----------|-----------|
| Ir1  | 0.009434  | -0.880275 | 0.080566  |
| C2   | 0.096974  | -2.861677 | -0.634996 |
| O3   | -0.208304 | -2.718461 | -2.04657  |
| C4   | -0.767646 | -3.962612 | -0.021322 |
| H5   | -0.112361 | -1.79259  | 1.353002  |
| H6   | 1.141342  | -3.20047  | -0.558806 |
| H7   | 0.002657  | -3.562646 | -2.486038 |
| H8   | -0.662232 | -4.91029  | -0.5769   |
| H9   | -1.829586 | -3.700152 | -0.020726 |
| H10  | -0.466176 | -4.152379 | 1.015782  |
| P11  | -2.306679 | -0.520795 | -0.145074 |
| P12  | 2.289885  | -0.598125 | 0.462294  |
| N13  | 0.070231  | 1.218677  | -0.141237 |
| C14  | -2.360289 | 1.306892  | -0.010113 |
| C15  | -1.101058 | 1.965403  | 0.052996  |
| C16  | -1.130819 | 3.33947   | 0.394803  |
| H17  | -0.202724 | 3.867858  | 0.573129  |
| C18  | -2.327607 | 4.031778  | 0.533975  |
| H19  | -2.290962 | 5.087215  | 0.798896  |
| C20  | -3.570546 | 3.412902  | 0.343676  |
| C21  | -3.550574 | 2.039017  | 0.09106   |
| H22  | -4.499371 | 1.521606  | -0.021508 |
| C23  | -4.863109 | 4.190813  | 0.421007  |
| H24  | -5.725815 | 3.523901  | 0.526806  |
| H25  | -5.028627 | 4.795944  | -0.481185 |
| H26  | -4.869017 | 4.881139  | 1.273466  |
| C27  | 2.505315  | 1.156725  | -0.007178 |
| C28  | 1.309351  | 1.836125  | -0.369969 |
| C29  | 1.470246  | 3.085775  | -1.016026 |
| H30  | 0.601415  | 3.591142  | -1.420638 |
| C31  | 2.719741  | 3.674967  | -1.161444 |
| H32  | 2.787438  | 4.637647  | -1.665496 |
| C33  | 3.889241  | 3.06615   | -0.68135  |
| C34  | 3.74893   | 1.793151  | -0.124688 |
| H35  | 4.640857  | 1.276676  | 0.219132  |

|     |           |           |           |
|-----|-----------|-----------|-----------|
| C36 | 5.235342  | 3.742009  | -0.79734  |
| H37 | 5.482671  | 3.979816  | -1.840214 |
| H38 | 6.035352  | 3.104627  | -0.405645 |
| H39 | 5.265208  | 4.687175  | -0.239279 |
| C40 | -3.357969 | -1.214559 | 1.261793  |
| H41 | -3.13628  | -2.288661 | 1.21374   |
| C42 | -2.849305 | -0.687323 | 2.614036  |
| H43 | -3.367723 | -1.20183  | 3.433009  |
| H44 | -3.043362 | 0.386174  | 2.714121  |
| H45 | -1.773878 | -0.849265 | 2.729359  |
| C46 | -4.881875 | -1.037675 | 1.152799  |
| H47 | -5.370106 | -1.622036 | 1.943207  |
| H48 | -5.287178 | -1.379044 | 0.195511  |
| H49 | -5.176428 | 0.006439  | 1.297205  |
| C50 | -3.262838 | -0.863023 | -1.731088 |
| H51 | -4.218148 | -0.334096 | -1.607503 |
| C52 | -3.543586 | -2.353648 | -1.971624 |
| H53 | -4.169998 | -2.467575 | -2.865843 |
| H54 | -4.073191 | -2.828445 | -1.138054 |
| H55 | -2.604673 | -2.886505 | -2.139688 |
| C56 | -2.516734 | -0.250636 | -2.928531 |
| H57 | -3.119085 | -0.369366 | -3.838497 |
| H58 | -1.560066 | -0.759307 | -3.081016 |
| H59 | -2.327964 | 0.818382  | -2.787279 |
| C60 | 3.449097  | -1.617481 | -0.619816 |
| H61 | 3.167777  | -2.646917 | -0.357697 |
| C62 | 4.959027  | -1.471325 | -0.372615 |
| H63 | 5.495283  | -2.234985 | -0.950533 |
| H64 | 5.236775  | -1.603889 | 0.678288  |
| H65 | 5.329313  | -0.497197 | -0.705601 |
| C66 | 3.105169  | -1.401509 | -2.104449 |
| H67 | 3.718547  | -2.067285 | -2.72539  |
| H68 | 3.318543  | -0.371304 | -2.410609 |
| H69 | 2.051589  | -1.612451 | -2.312568 |
| C70 | 2.949294  | -0.772662 | 2.209973  |
| H71 | 3.987365  | -0.413231 | 2.185485  |
| C72 | 2.940316  | -2.238648 | 2.671105  |
| H73 | 3.330851  | -2.311747 | 3.693751  |
| H74 | 3.557577  | -2.882931 | 2.035659  |
| H75 | 1.920748  | -2.639979 | 2.671624  |

|     |          |           |          |
|-----|----------|-----------|----------|
| C76 | 2.153046 | 0.120433  | 3.174224 |
| H77 | 2.581825 | 0.055095  | 4.18225  |
| H78 | 1.105653 | -0.194979 | 3.225965 |
| H79 | 2.173635 | 1.169628  | 2.863315 |

---

**Table S5.** Cartesian Coordinates for Geometry Optimized Structures  
[PNP<sup>Pr</sup>]<sup>+</sup>Ir(H)(OEt) (E = -2012.146217 Hartrees E<sub>rel</sub> = -8.6 kcal/mol)

| Atom | x         | y         | z         |
|------|-----------|-----------|-----------|
| Ir1  | -0.012574 | -0.843644 | 0.039283  |
| C2   | 0.641852  | -3.71562  | -0.851954 |
| C3   | 0.68569   | -4.709194 | 0.310516  |
| O4   | -0.299979 | -2.70276  | -0.628138 |
| P5   | 2.292624  | -0.457523 | -0.269295 |
| P6   | -2.311549 | -0.570093 | 0.417946  |
| N7   | -0.064032 | 1.271223  | 0.010119  |
| C8   | 2.357422  | 1.328332  | 0.115013  |
| C9   | 1.100508  | 1.982649  | 0.251389  |
| C10  | 1.130642  | 3.323138  | 0.717545  |
| C11  | 2.326209  | 3.984469  | 0.950387  |
| C12  | 3.571912  | 3.365656  | 0.750334  |
| C13  | 3.551119  | 2.029737  | 0.350962  |
| C14  | 4.865894  | 4.109862  | 0.981368  |
| C15  | -2.49114  | 1.157407  | -0.127802 |
| C16  | -1.273231 | 1.877123  | -0.305131 |
| C17  | -1.386048 | 3.162211  | -0.898888 |
| C18  | -2.619244 | 3.712672  | -1.212842 |
| C19  | -3.826216 | 3.032074  | -0.977287 |
| C20  | -3.724473 | 1.745821  | -0.448955 |
| C21  | -5.16096  | 3.65779   | -1.306087 |
| C22  | 3.604171  | -1.195837 | 0.864159  |
| C23  | 3.179497  | -1.062778 | 2.335279  |
| C24  | 2.958139  | -0.682646 | -2.018412 |
| C25  | 1.979976  | -0.046501 | -3.02021  |
| C26  | 4.389652  | -0.174006 | -2.245654 |
| C27  | -3.514507 | -1.589084 | -0.594721 |
| C28  | -3.547622 | -3.045057 | -0.096862 |
| C29  | -3.143554 | -1.525278 | -2.085446 |
| C30  | -2.9337   | -0.683417 | 2.193072  |
| C31  | -4.447678 | -0.45775  | 2.343649  |
| C32  | -2.157521 | 0.278115  | 3.106897  |
| C33  | 3.973047  | -2.648322 | 0.528352  |
| H34  | 0.258798  | -0.515579 | 1.543758  |
| H35  | 1.650332  | -3.308177 | -1.027748 |



|     |           |           |           |
|-----|-----------|-----------|-----------|
| H36 | 0.353307  | -4.252229 | -1.771761 |
| H37 | -0.300038 | -5.163654 | 0.460521  |
| H38 | 0.962392  | -4.196934 | 1.239587  |
| H39 | 1.410829  | -5.512064 | 0.12274   |
| H40 | 0.198219  | 3.832104  | 0.93078   |
| H41 | 2.2932    | 5.008443  | 1.31896   |
| H42 | 4.502072  | 1.514875  | 0.238416  |
| H43 | 5.725085  | 3.43046   | 0.967798  |
| H44 | 4.868075  | 4.628331  | 1.948557  |
| H45 | 5.040747  | 4.873045  | 0.210582  |
| H46 | -0.487992 | 3.714826  | -1.147875 |
| H47 | -2.645786 | 4.697291  | -1.676976 |
| H48 | -4.63672  | 1.170759  | -0.305867 |
| H49 | -5.176965 | 4.068362  | -2.323705 |
| H50 | -5.402661 | 4.485164  | -0.62483  |
| H51 | -5.972847 | 2.926203  | -1.231418 |
| H52 | 4.498452  | -0.578351 | 0.711351  |
| H53 | 3.990385  | -1.408044 | 2.988909  |
| H54 | 2.293364  | -1.672375 | 2.54281   |
| H55 | 2.948735  | -0.026522 | 2.600376  |
| H56 | 2.943294  | -1.769703 | -2.174135 |
| H57 | 2.317952  | -0.236198 | -4.046547 |
| H58 | 1.921628  | 1.038779  | -2.880137 |
| H59 | 0.969835  | -0.454439 | -2.912233 |
| H60 | 4.69985   | -0.391212 | -3.275637 |
| H61 | 5.118059  | -0.647281 | -1.578266 |
| H62 | 4.449949  | 0.910215  | -2.104818 |
| H63 | -4.507776 | -1.13976  | -0.461679 |
| H64 | -4.238893 | -3.63064  | -0.716214 |
| H65 | -3.888523 | -3.126163 | 0.94115   |
| H66 | -2.54978  | -3.485796 | -0.174195 |
| H67 | -3.891036 | -2.071359 | -2.674918 |
| H68 | -2.166986 | -1.989593 | -2.252474 |
| H69 | -3.110539 | -0.494854 | -2.454061 |
| H70 | -2.697689 | -1.713044 | 2.493857  |
| H71 | -4.732839 | -0.571601 | 3.397043  |
| H72 | -5.043694 | -1.169773 | 1.764391  |
| H73 | -4.728331 | 0.555864  | 2.036673  |
| H74 | -2.496383 | 0.157583  | 4.143321  |
| H75 | -2.328481 | 1.320747  | 2.816139  |

|     |           |           |           |
|-----|-----------|-----------|-----------|
| H76 | -1.080729 | 0.092822  | 3.076119  |
| H77 | 4.80033   | -2.972091 | 1.172332  |
| H78 | 4.297409  | -2.77361  | -0.509921 |
| H79 | 3.133483  | -3.325897 | 0.706924  |

---

**Table S6.** Cartesian Coordinates for Transition State of CH oxidative addition of EtOH to  $[\text{PNP}^{\text{Pr}^i}]_{\text{Ir}}$  ( $E = -2012.1022493$  Hartrees,  $E_{\text{rel}} = +18.9$  kcal/mol, imaginary frequency =  $681.53i$   $\text{cm}^{-1}$ ).

| Atom | x         | y         | z         |
|------|-----------|-----------|-----------|
| Ir1  | -0.007217 | -0.835932 | 0.019024  |
| C2   | -0.124063 | -3.108514 | -0.386043 |
| O3   | -1.483258 | -3.561437 | -0.324498 |
| C4   | 0.79742   | -4.191813 | 0.180467  |
| H5   | -0.142671 | -2.299128 | 0.754447  |
| H6   | 0.15821   | -2.888299 | -1.423292 |
| H7   | -1.537333 | -4.385218 | -0.837625 |
| H8   | 0.702069  | -5.113757 | -0.411749 |
| H9   | 0.535337  | -4.430725 | 1.217255  |
| H10  | 1.846842  | -3.889973 | 0.150782  |
| P11  | -2.297384 | -0.489875 | -0.290177 |
| P12  | 2.282632  | -0.572969 | 0.366191  |
| N13  | 0.044715  | 1.22509   | -0.084553 |
| C14  | -2.383862 | 1.303607  | 0.044758  |
| C15  | -1.124373 | 1.945698  | 0.185755  |
| C16  | -1.147756 | 3.278334  | 0.666626  |
| H17  | -0.216718 | 3.781204  | 0.898094  |
| C18  | -2.34268  | 3.954841  | 0.873361  |
| H19  | -2.304612 | 4.976346  | 1.248481  |
| C20  | -3.588542 | 3.361296  | 0.61988   |
| C21  | -3.573181 | 2.023122  | 0.221177  |
| H22  | -4.5225   | 1.522619  | 0.051695  |
| C23  | -4.878488 | 4.128947  | 0.789377  |
| H24  | -5.745372 | 3.459088  | 0.784105  |
| H25  | -5.027603 | 4.86104   | -0.016464 |
| H26  | -4.896217 | 4.687295  | 1.733819  |
| C27  | 2.476507  | 1.1974    | -0.033974 |
| C28  | 1.260125  | 1.875073  | -0.31139  |
| C29  | 1.374789  | 3.171793  | -0.873275 |
| H30  | 0.482602  | 3.688102  | -1.20765  |
| C31  | 2.607678  | 3.790579  | -1.022993 |
| H32  | 2.641783  | 4.786294  | -1.462249 |
| C33  | 3.80535   | 3.170338  | -0.630474 |
| C34  | 3.705484  | 1.862131  | -0.154621 |

|     |           |           |           |
|-----|-----------|-----------|-----------|
| H35 | 4.61679   | 1.341705  | 0.126615  |
| C36 | 5.133959  | 3.880519  | -0.741421 |
| H37 | 5.278094  | 4.318524  | -1.737416 |
| H38 | 5.968802  | 3.195569  | -0.557025 |
| H39 | 5.219274  | 4.702142  | -0.017097 |
| C40 | -3.439954 | -1.367051 | 0.924085  |
| H41 | -3.18545  | -2.416596 | 0.743127  |
| C42 | -3.029772 | -1.022889 | 2.366135  |
| H43 | -3.588429 | -1.651242 | 3.071769  |
| H44 | -3.245952 | 0.024697  | 2.604017  |
| H45 | -1.959615 | -1.191502 | 2.524025  |
| C46 | -4.954405 | -1.192222 | 0.725182  |
| H47 | -5.487269 | -1.881163 | 1.393514  |
| H48 | -5.280408 | -1.413665 | -0.29623  |
| H49 | -5.286501 | -0.180376 | 0.978059  |
| C50 | -3.101901 | -0.649217 | -1.98848  |
| H51 | -4.08611  | -0.170618 | -1.887239 |
| C52 | -3.311804 | -2.096055 | -2.458404 |
| H53 | -3.851504 | -2.094513 | -3.414387 |
| H54 | -3.89003  | -2.691544 | -1.745577 |
| H55 | -2.354296 | -2.603086 | -2.611552 |
| C56 | -2.286965 | 0.145404  | -3.022105 |
| H57 | -2.777769 | 0.098064  | -4.002713 |
| H58 | -1.277619 | -0.269048 | -3.123242 |
| H59 | -2.19021  | 1.198321  | -2.74123  |
| C60 | 3.43094   | -1.51299  | -0.808532 |
| H61 | 3.166418  | -2.56184  | -0.623091 |
| C62 | 4.945944  | -1.375722 | -0.585732 |
| H63 | 5.474934  | -2.084211 | -1.236336 |
| H64 | 5.246863  | -1.591895 | 0.444459  |
| H65 | 5.30216   | -0.374257 | -0.843992 |
| C66 | 3.059877  | -1.18978  | -2.266226 |
| H67 | 3.62129   | -1.839155 | -2.950022 |
| H68 | 3.302914  | -0.150553 | -2.512283 |
| H69 | 1.99011   | -1.333901 | -2.450108 |
| C70 | 3.034488  | -0.779292 | 2.077518  |
| H71 | 4.059451  | -0.387752 | 2.018022  |
| C72 | 3.089541  | -2.250708 | 2.513668  |
| H73 | 3.546431  | -2.329913 | 3.508098  |
| H74 | 3.679337  | -2.872183 | 1.830626  |

|     |          |           |          |
|-----|----------|-----------|----------|
| H75 | 2.081827 | -2.67571  | 2.57583  |
| C76 | 2.249797 | 0.067382  | 3.092036 |
| H77 | 2.700747 | -0.027952 | 4.088101 |
| H78 | 1.207427 | -0.264028 | 3.150122 |
| H79 | 2.249638 | 1.126844  | 2.818168 |

---

**Table S7.** Cartesian Coordinates for Transition State of OH oxidative addition of EtOH to  $[\text{PNP}^{\text{Pr}^i}]\text{Ir}$  ( $E = -2012.1092443$  Hartrees,  $E_{\text{rel}} = +14.6$  kcal/mol, imaginary frequency =  $1158.39i$   $\text{cm}^{-1}$ ).

| Atom | x         | y         | z         |
|------|-----------|-----------|-----------|
| Ir1  | -0.025278 | -0.795082 | 0.017305  |
| C2   | 0.70328   | -3.907574 | -0.190052 |
| C3   | 0.045656  | -5.180784 | -0.713251 |
| O4   | -0.313048 | -2.967895 | 0.120955  |
| P5   | 2.288704  | -0.48201  | -0.247456 |
| P6   | -2.296277 | -0.503328 | 0.41277   |
| N7   | -0.036437 | 1.254844  | -0.065719 |
| C8   | 2.386464  | 1.317654  | 0.070391  |
| C9   | 1.133004  | 1.974004  | 0.188828  |
| C10  | 1.156108  | 3.314781  | 0.644733  |
| C11  | 2.351647  | 3.98016   | 0.87749   |
| C12  | 3.596871  | 3.361915  | 0.685384  |
| C13  | 3.578226  | 2.019901  | 0.300941  |
| C14  | 4.890654  | 4.109556  | 0.906695  |
| C15  | -2.475214 | 1.228326  | -0.125409 |
| C16  | -1.244692 | 1.899098  | -0.362868 |
| C17  | -1.327739 | 3.167952  | -0.986871 |
| C18  | -2.552709 | 3.75636   | -1.271766 |
| C19  | -3.77193  | 3.127415  | -0.973794 |
| C20  | -3.697513 | 1.849857  | -0.415721 |
| C21  | -5.095424 | 3.794337  | -1.265656 |
| C22  | 3.589309  | -1.169982 | 0.933559  |
| C23  | 3.114006  | -1.019982 | 2.387344  |
| C24  | 2.988344  | -0.780889 | -1.973525 |
| C25  | 2.028752  | -0.186355 | -3.018006 |
| C26  | 4.425349  | -0.29006  | -2.204677 |
| C27  | -3.555391 | -1.483435 | -0.572761 |
| C28  | -3.668171 | -2.926189 | -0.05162  |
| C29  | -3.178045 | -1.460042 | -2.062656 |
| C30  | -2.862164 | -0.622113 | 2.202587  |
| C31  | -4.33486  | -0.249009 | 2.430817  |
| C32  | -1.933942 | 0.20814   | 3.103441  |
| C33  | 4.024207  | -2.611783 | 0.634615  |
| H34  | 0.024359  | -2.104538 | 1.078623  |

|     |           |           |           |
|-----|-----------|-----------|-----------|
| H35 | 1.294008  | -4.143643 | 0.709263  |
| H36 | 1.394823  | -3.509247 | -0.945835 |
| H37 | -0.527491 | -4.970968 | -1.622681 |
| H38 | -0.638196 | -5.596266 | 0.034797  |
| H39 | 0.804553  | -5.937969 | -0.947636 |
| H40 | 0.223067  | 3.827289  | 0.845657  |
| H41 | 2.31582   | 5.007422  | 1.236341  |
| H42 | 4.529634  | 1.503885  | 0.198556  |
| H43 | 5.745292  | 3.42549   | 0.948452  |
| H44 | 4.873801  | 4.678224  | 1.844825  |
| H45 | 5.088653  | 4.829729  | 0.100784  |
| H46 | -0.419016 | 3.681258  | -1.27827  |
| H47 | -2.561103 | 4.729093  | -1.760754 |
| H48 | -4.623518 | 1.311408  | -0.2262   |
| H49 | -5.117022 | 4.228035  | -2.27322  |
| H50 | -5.303767 | 4.611823  | -0.561693 |
| H51 | -5.925115 | 3.082819  | -1.192613 |
| H52 | 4.466797  | -0.52618  | 0.796405  |
| H53 | 3.911035  | -1.327986 | 3.076089  |
| H54 | 2.235359  | -1.644983 | 2.579363  |
| H55 | 2.844973  | 0.015033  | 2.619489  |
| H56 | 2.968913  | -1.874811 | -2.07968  |
| H57 | 2.379018  | -0.423362 | -4.030587 |
| H58 | 1.976355  | 0.904827  | -2.927706 |
| H59 | 1.014918  | -0.581831 | -2.898643 |
| H60 | 4.75307   | -0.563635 | -3.215845 |
| H61 | 5.14192   | -0.725148 | -1.499657 |
| H62 | 4.485838  | 0.800345  | -2.123115 |
| H63 | -4.52585  | -0.983913 | -0.450261 |
| H64 | -4.355259 | -3.49635  | -0.689774 |
| H65 | -4.059492 | -2.968689 | 0.970684  |
| H66 | -2.690787 | -3.417857 | -0.066765 |
| H67 | -3.938641 | -1.991057 | -2.649165 |
| H68 | -2.213525 | -1.953657 | -2.222069 |
| H69 | -3.105611 | -0.437987 | -2.448414 |
| H70 | -2.721607 | -1.682967 | 2.45075   |
| H71 | -4.593039 | -0.385567 | 3.488669  |
| H72 | -5.023267 | -0.865158 | 1.842708  |
| H73 | -4.517122 | 0.801998  | 2.18132   |
| H74 | -2.210311 | 0.067374  | 4.156093  |

|     |           |           |           |
|-----|-----------|-----------|-----------|
| H75 | -2.017026 | 1.277066  | 2.874997  |
| H76 | -0.887782 | -0.083297 | 2.971909  |
| H77 | 4.842859  | -2.892465 | 1.309234  |
| H78 | 4.385703  | -2.739648 | -0.390932 |
| H79 | 3.208747  | -3.320841 | 0.797551  |

---
